# Supplementary material for: Sodium and Potassium Intake Assessed by Spot and 24-h Urine in the Population-Based Tromsø Study 2015–2016
Source: PubMed Central journal article supplement (PMC6682958; doi:10.3390/nu11071619), 2019-07-16
Supplement: nutrients-11-01619-s001.pdf [file nutrients-11-01619-s001.pdf]

## Supplementary data

**Table 1.** Equations used in the estimation of 24-hour sodium excretion from spot urine sodium.

|                                                                                                                                                                                                                                 |
|---------------------------------------------------------------------------------------------------------------------------------------------------------------------------------------------------------------------------------|
| <b>INTERSALT; Estimated sodium excretion (1):</b>                                                                                                                                                                               |
| Men: $25.46 + (0.46 \times 3 \text{ Na}_{\text{spot}}) - (2.75 \times \text{Cr}_{\text{spot}}) - (0.13 \times \text{K}_{\text{spot}}) + (4.1 \times \text{BMI}) + (0.26 \times \text{age}) + 23.17$                             |
| Women: $5.07 + (0.34 \times \text{Na}_{\text{spot}}) - (2.16 \times \text{Cr}_{\text{spot}}) - (0.09 \times \text{K}_{\text{spot}}) + (2.39 \times \text{BMI}) + (2.35 \times \text{age}) + (0.03 \times \text{age}^2) + 15.73$ |
|                                                                                                                                                                                                                                 |
| <b>Toft et al; Estimated sodium excretion (2):</b>                                                                                                                                                                              |
| Men, PRCr: $-7.54 \times \text{age} + 14.15 \times \text{weight} + 3.48 \times \text{height (cm)} + 423.15$                                                                                                                     |
| Women, PRCr: $-6.13 \times \text{age} + 9.97 \times \text{weight} + 2.45 \times \text{height (cm)} + 342.73$                                                                                                                    |
| Men, PRNa: $33.56 * (\text{Na}_{\text{spot}} / (\text{Cr}_{\text{spot}} * 113.1) * \text{PRCr})^{0.345}$                                                                                                                        |
| Women, PRNa: $52.65 * (\text{Na}_{\text{spot}} / (\text{Cr}_{\text{spot}} * 113.1) * \text{PRCr})^{0.196}$                                                                                                                      |
|                                                                                                                                                                                                                                 |
| <b>Tanaka et al; Estimated sodium excretion (3):</b>                                                                                                                                                                            |
| PRCr = $2.04 \times \text{age} + 14.89 \times \text{weight (kg)} + 16.14 \times \text{height (cm)} - 2244.45$                                                                                                                   |
| PRNa = $21.98 * (\text{Na}_{\text{spot}} / (\text{Cr}_{\text{spot}} * 113.1) * \text{PRCr})^{0.392}$                                                                                                                            |

### Abbreviations:

$\text{Cr}_{\text{spot}}$ : spot urinary creatinine in mmol/L. *Multiplying  $\text{Cr}_{\text{spot}}$  with 113.1 IN THE Toft and Tanaka formulae in order to transform from mmol/l to mg/l as used in the formulae*

$\text{Na}_{\text{spot}}$ : spot urinary sodium in mmol/L

$\text{K}_{\text{spot}}$ : spot urinary potassium in mmol/L

PRCr: Predicted 24-hour urinary creatinine (mg/d)

Weight (kg)

Height (cm)

BMI (kg/m<sup>2</sup>)

Age (years)

### References to Supplementary table S1

1. Brown IJ, Dyer AR, Chan Q, Cogswell ME, Ueshima H, Stamler J, et al. Estimating 24-Hour Urinary Sodium Excretion From Casual Urinary Sodium Concentrations in Western Populations: The INTERSALT Study. *American journal of epidemiology*. 2013;177(11):1180-92.
2. Toft U, Cerqueira C, Andreassen AH, Thuesen BH, Laurberg P, Ovesen L, et al. Estimating salt intake in a Caucasian population: can spot urine substitute 24-hour urine samples? *European journal of preventive cardiology*. 2014;21(10):1300-7.
3. Tanaka T, Okamura T, Miura K, Kadowaki T, Ueshima H, Nakagawa H, et al. A simple method to estimate populational 24-h urinary sodium and potassium excretion using a casual urine specimen. *Journal of human hypertension*. 2002;16(2):97-103.

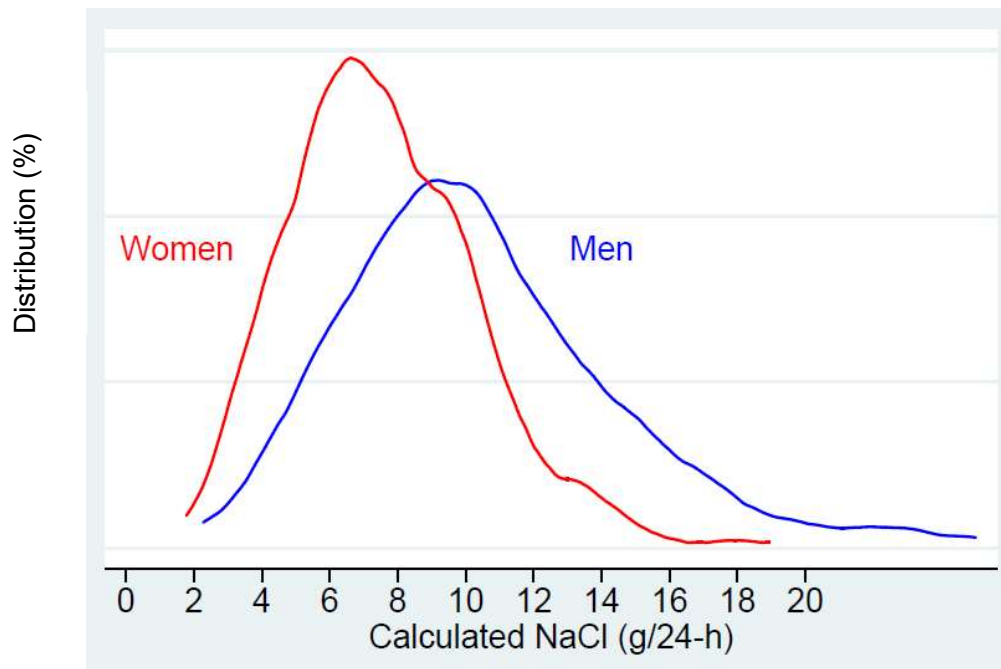

**Figure S1.** Distribution of daily salt (NaCl) intake calculated by one 24-hour urine collection in men and women aged 40-69 years participating in the seventh wave of the Tromsø Study 2015-16.

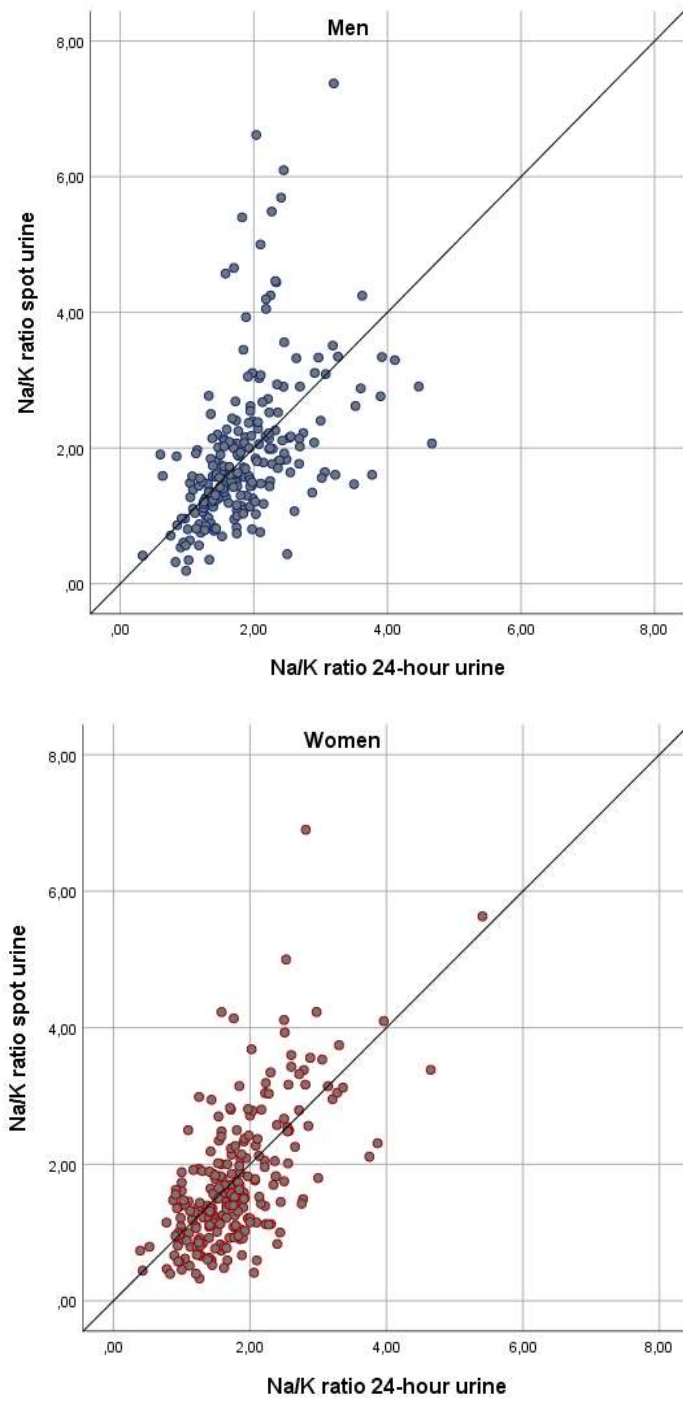

**Figure S2.** Correlation between Na/K ratio in 24-hour urine and spot urine samples in 232 men and 243 women in the seventh wave of the Tromsø study 2015-16.

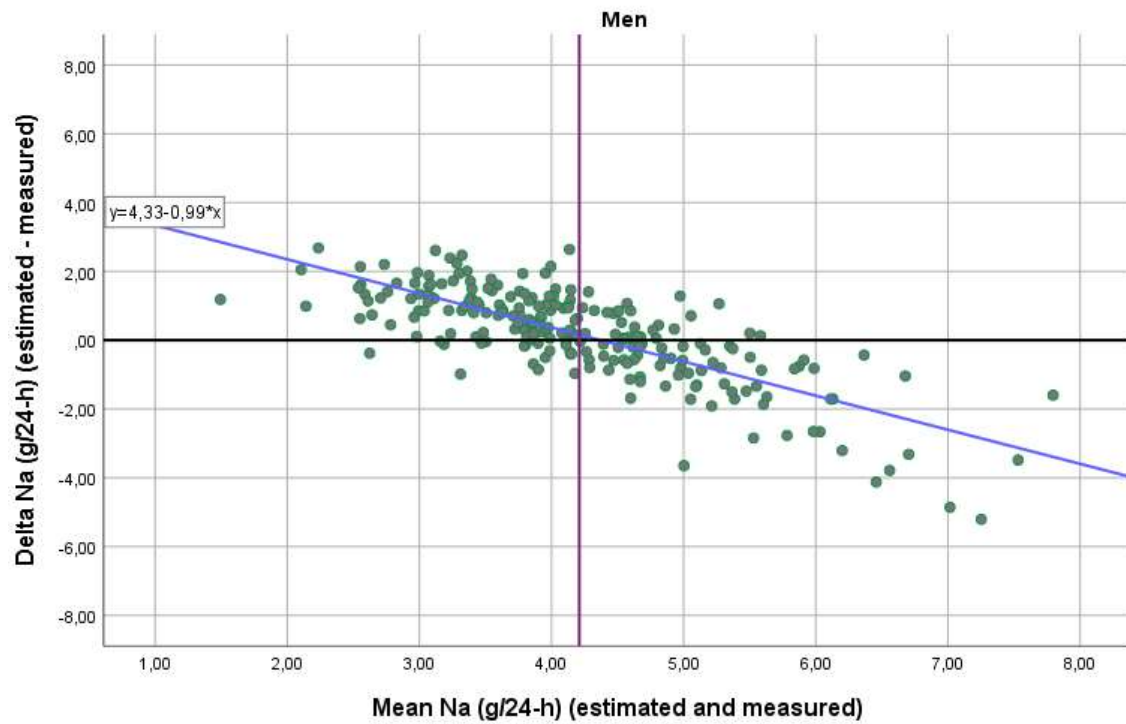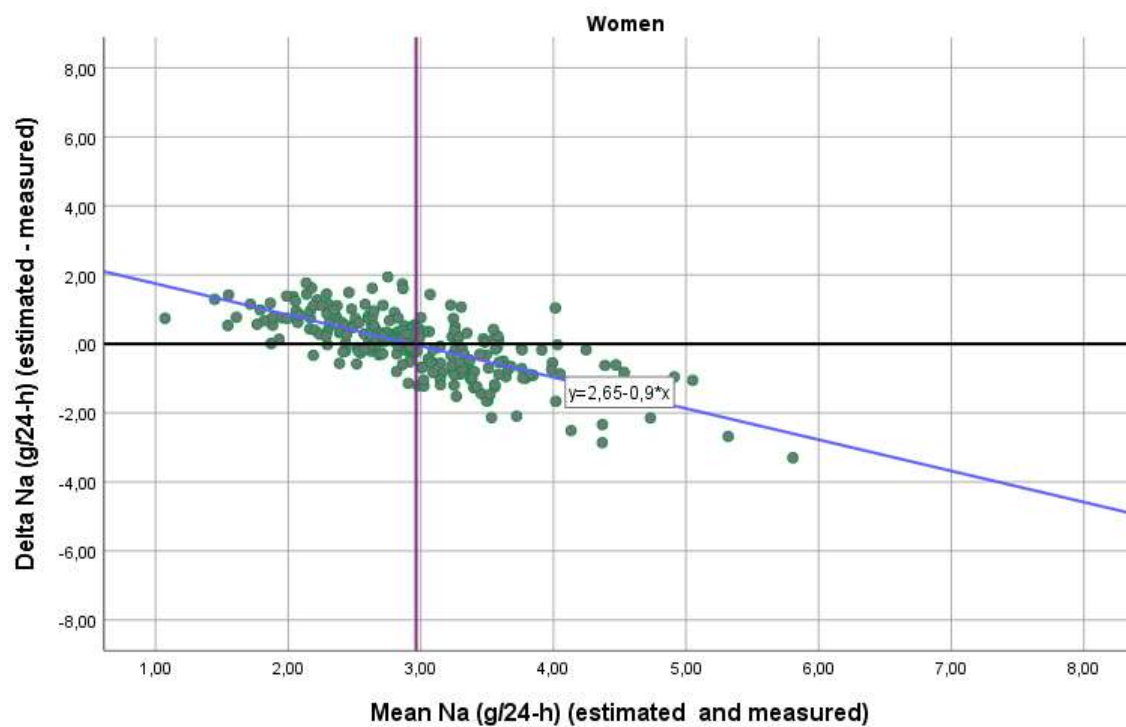

**Figure S3.** Bland-Altman plot – sodium excretion estimated from spot urine by the INTERSALT formula versus sodium excretion measured in 24-hour urine in 232 men and 243 women in the seventh wave of the Tromsø study 2015-16. The vertical line indicates mean sodium excretion
